# Supplementary material for: Contamination by Norovirus and Adenovirus on Environmental Surfaces and in Hands of Conscripts in Two Finnish Garrisons
Source: PubMed Central journal article supplement (PMC5309312; doi:10.1007/s12560-016-9262-4), 2016-09-30
Supplement: 12560_2016_9262_MOESM1_ESM.pdf [file 12560_2016_9262_MOESM1_ESM.pdf]

## Online Resource 1

**Journal:** Food and Environmental Virology

**Article Title:** Contamination by Norovirus and Adenovirus on Environmental Surfaces and in Hands of Conscripts in Two Finnish Garrisons

**Authors:** Satu Oristo, Maria Rönnqvist, Mika Aho, Ava Sovijärvi, Tuula Hannila-Handelberg, Ari Hörman, Simo Nikkari, Paula M. Kinnunen, and Leena Maunula.

**Corresponding author:** Satu Oristo, Department of Food Hygiene and Environmental Health, University of Helsinki, Finland. [satu.oristo@helsinki.fi](mailto:satu.oristo@helsinki.fi)

## Online Resource 1

Online Resource 1. The primers and probes used in this study

| Assay   | Target virus        | Oligonucleotide | Sequence and label (5' → 3')     | Nucleotide position                                  | Reference                  |
|---------|---------------------|-----------------|----------------------------------|------------------------------------------------------|----------------------------|
| rRT-PCR | NoV GI <sup>a</sup> | QNIF4           | CGCTGGATGCGNTTCCAT               | 5291 – 5308 <sup>b</sup>                             | da Silva et al. 2007       |
|         |                     | QNIF3           | GTCCTTAGACGCCATCATCATTT          | 5356 – 5378 <sup>b</sup>                             | Summa et al. 2012          |
|         |                     | JJV1P           | FAM-TGTGGACAGGAGATCGCAATCTC-BHQ1 | 5319 – 5342 <sup>b</sup>                             | Jothikumar et al. 2005b    |
|         | NoV GII             | QNIF2D          | ATGTTTCAGRTGGATGAGRTTCTCWGA      | 5012 – 5037 <sup>c</sup>                             | Loisy et al. 2005          |
|         |                     | COG2R           | TCGACGCCATCTTCATTACACA           | 5080 – 5100 <sup>c</sup>                             | Kageyama et al. 2003       |
|         |                     | QNIFS           | FAM-AGCACGTGGGAGGGCGATCG-BHQ1    | 5042 – 5061 <sup>c</sup>                             | Loisy et al. 2005          |
|         | MeV                 | Mengo 110       | GCGGGTCTGCCGAAAGT                | 110 – 127 <sup>d</sup>                               | Pintó et al. 2009          |
|         |                     | Mengo209        | GAAGTAACATATAGACAGACGCACAC       | 184 – 209 <sup>d</sup>                               | Pintó et al. 2009          |
|         |                     | Mengo147        | ATCACATTACTGGCCGAAGC             | 147 – 166 <sup>d</sup>                               | Pintó et al. 2009          |
|         | MuNoV               | MNV for         | TGCAAGCTCTACAACGAAGG             | 6520 – 6539 <sup>e</sup>                             | Hewitt et al. 2009         |
|         |                     | MNV rev         | CACAGAGGCCAATTGGTAAA             | 6626 – 6645 <sup>e</sup>                             | Hewitt et al. 2009         |
|         |                     | MNV pro         | TAMRA-CCTTCCCACCGATGGCATC-BHQ1   | 6578 – 6597 <sup>e</sup>                             | Hewitt et al. 2009         |
| rPCR    | AdV                 | JTVXF           | GGACGCCTCGGAGTACCTGAG            | 54 – 74 <sup>f</sup>                                 | Jothikumar et al. 2005a    |
|         |                     | JTVXR           | ACIGTGGGGTTTCTGAACCTTGTT         | 127 – 149 <sup>f</sup>                               | Jothikumar et al. 2005a    |
|         |                     | JTVXP           | FAM-CTGGTGCAGTTCGCCCCGTGCCA-BHQ1 | 82 – 103 <sup>f</sup>                                | Jothikumar et al. 2005a    |
|         | AdV 40/41           | AdV Fs          | CTCGACATGACTTTTGAGGT             | 2614 – 2633 <sup>f</sup>                             | van Maarseveen et al. 2010 |
|         |                     | AdV Fas         | GTAGACGGCCTCGATGAC               | 2716 – 2733 <sup>f</sup>                             | van Maarseveen et al. 2010 |
|         |                     | AdV Pro         | AGCCACACTTCT                     | 2648 – 2660 <sup>f</sup>                             | van Maarseveen et al. 2010 |
|         |                     |                 |                                  |                                                      |                            |
| RT-PCR  | NoV GI              | JJVMF           | CCATGTTCCGTTGGATGC               | 5283 – 5300 <sup>b</sup>                             | Hill et al. 2010           |
|         |                     | G1SKR           | CCAACCCARCCATTRTACA              | 5653 – 5671 <sup>b</sup>                             | Kojima et al. 2002         |
|         | NoV GI.6            | GI.6 FF         | AGCTGGTACCGGAGGCTAAT             | 5413 – 5432 <sup>g</sup>                             | This study                 |
|         |                     | GI.6 RR         | AACAAAATGTCACCGGGGGT             | 5577 – 5596 <sup>g</sup>                             | This study                 |
|         | NoV GII             | QNIF2D          | ATGTTTCAGRTGGATGAGRTTCTCWGA      | 5012 – 5037 <sup>c</sup>                             | Loisy et al. 2005          |
|         |                     | G2SKR           | CCRCCNGCATRHCCRTTRTACAT          | 5367 – 5389 <sup>c</sup>                             | Kojima et al. 2002         |
|         | NoV GI,<br>NoV GII  | MJV12           | TAYCAYTATGATGCHGAYTA             | 4553 – 4572 <sup>b</sup><br>4280 – 4299 <sup>c</sup> | Vinje et al. 2004          |
|         |                     | RegA            | CTCRTCATCICCATARAAIGA            | 4859 – 4879 <sup>b</sup><br>4586 – 4606 <sup>c</sup> | Vinje et al. 2004          |

<sup>a</sup> NoV GI: Norovirus genogroup I, NoV GII: Norovirus genogroup II, MeV: Mengovirus, MuNoV: Murine norovirus, AdV: Adenovirus, AdV 40/41: Adenovirus types 40 and 41  
<sup>b</sup> Positions based on complete NoV GI genome (GenBank accession no. M87661)  
<sup>c</sup> Positions based on complete NoV GII genome (GenBank accession no. X86557)  
<sup>d</sup> Positions based on complete MeV genome (GenBank accession no. L22089)  
<sup>e</sup> Positions based on complete MuNoV genome (GenBank accession no. AY228235)  
<sup>f</sup> Positions based on AdV hexon gene (GenBank accession no. X51782)  
<sup>g</sup> Positions based on complete NoV GI.6 genome (GenBank accession no. JQ388274)
